# Supplementary material for: Molecularly imprinted electrochemical sensor for advanced diagnosis of alpha-fetoprotein
Source: Royal Society of Chemistry journal article supplement (doi:10.1039/c6ay01922f), 2016-01-01
Supplement: c6ay01922f1.pdf [file c6ay01922f1.pdf]

## Supplementary documents

### Molecularly imprinted electrochemical sensor for advanced diagnosis of alpha-fetoprotein

Xiaolei Shen, Ya Ma, Qiang Zeng, Jia Tao, Jianzhi Huang, Lishi Wang\*

Key Laboratory of Fuel Cell Technology of Guangdong Province, School of Chemistry and Chemical Engineering, South China University of Technology, Guangzhou

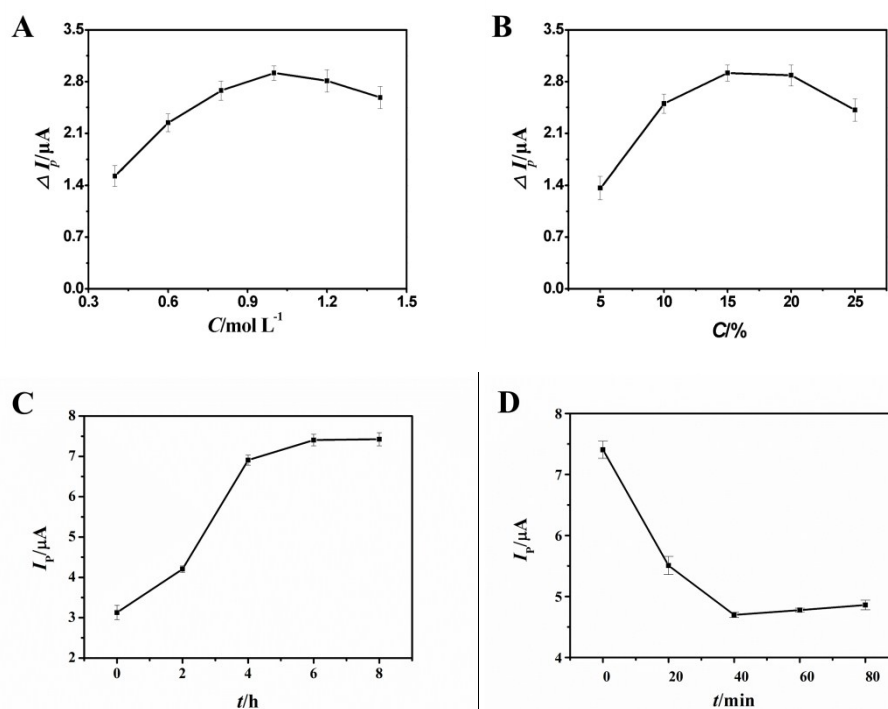

**Fig.S1** (A) (B) (C) (D) were the effect of monomer concentration, cross-linker concentration, elution time and reabsorption time, respectively. The DPV assays were performed in PBS buffer (pH 7.4) containing 5.0 mmol L<sup>-1</sup> [Fe(CN)<sub>6</sub>]<sup>3-/4-</sup> (1:1) and 0.1 mol L<sup>-1</sup> KCl.

**Table S1** Comparison of the linear range and the detection limit between the proposed

| Method             | Detection scheme       | Linear range<br>(ng/mL) | Detection limit<br>(ng/mL) | Reference    |
|--------------------|------------------------|-------------------------|----------------------------|--------------|
| MIP <sup>a</sup>   | Fluorescence intensity | 3.96 ~ 80               | 0.42                       | Karfa., 2016 |
| ECL <sup>b</sup>   | ECL intensity          | 0.005 ~ 100             | 0.0012                     | Zhang., 2015 |
| ECI <sup>c</sup>   | SWV <sup>e</sup>       | 0.001 ~ 5               | 0.0003                     | De., 2015    |
| ELISA <sup>d</sup> | DPV <sup>f</sup>       | 0.05 ~ 100              | 0.02                       | Liu., 2013   |
| ECI                | DPV                    | 0 ~ 150                 | 0.74                       | Yu., 2004    |
| MIP                | DPV                    | 0.8 ~ 10000             | 0.096                      | This work    |

and previously reported electrochemical methods for AFP determination

\*a- Molecularly imprinted polymer, b- Electrochemiluminescence, c- Electrochemical immunoassay, d- Enzyme-linked immunosorbent assay, e- Square wave voltammetry, f- Differential pulse voltammetry

#### References

- P. Karfa, E. Roy, S. Patra, D. Kumar, R. Madhuri, P. K. Sharma, *Biosens. Bioelectron.*, 2016, **78**, 454-463.
- L. Zhang, L. Li, C. Ma, S. Ge, M. Yan, C. Bian, *Sens. Actuators B.*, 2015, **221**, 799-806.
- D. Wang, N. Gan, H. R. Zhang, T. H. Li, L. Qiao, Y. T. Cao, X. R. Su and S. Jiang, *Biosens. Bioelectron.*, 2015, **65**, 78-82.
- Q. L. Liu, X. H. Yan, X. M. Yin, B. Situ, H. K. Zhou, L. Lin, B. Li, N. Gan, L. Zheng, *Molecules*, 2013, 18, 12675-12686.
- H. Yu, F. Yan, Z. Dai and H. X. Ju, *Anal. Biochem.* 2004, **331**, 98–105.
